# Supplementary material
Source: Research Square preprint supplement (doi:10.21203/rs.3.rs-10034733/v1)
Supplement: Supplementary file 1 [file 08240d88afe087e440630ee8.docx]

**Appendix**

**Table 1A - Variables description**

| **Variables** | **Categories** |
| --- | --- |
| Responsible organisation category | Academic research |
|  | Central Government |
|  | Consortium |
|  | European Institution |
|  | Local Government |
|  | Non-Governmental |
|  | Private Sector |
|  | Regional Government |
|  | State-Owned Enterpise |
| Functions of Government (COFOG level I) | Economic Affairs |
|  | Education |
|  | Environmental Protection |
|  | General Public Services |
|  | Health |
|  | Housing and community amenities |
|  | Public Order and Safety |
|  | Recreation, Culture and Religion |
|  | Social Protection |
| Status | Implemented |
|  | In development |
|  | Not in use |
|  | Pilot |
|  | Planned |
| Process Type | Adjudication |
|  | Analysis, monitoring and regulatory research |
|  | Enforcement |
|  | Internal management |
|  | Public Services and Engagement |
| Interaction | G2B |
|  | G2C |
|  | G2G |
| AI classification | Communication |
|  | Ethics and Philosophy |
|  | Integration and Interaction |
|  | Learning |
|  | Perception |
|  | Planning |
|  | Reasoning |
|  | Services |
|  |  |
|  |  |

**Table 2A – Contributions and coordinates of categories (top five categories by total contribution)**

Dim. 1

| Categories | contributions | coordinates |
| --- | --- | --- |
| Public services and engagement | 16.392204 | -1.0603917 |
| G2C | 14.486131 | -0.9572110 |
| G2G | 12.539727 | 0.8192193 |
| Communication | 11.655799 | -1.2064673 |
| Public order and safety | 8.089827 | 1.2553836 |

Dim.2

| Categories | contributions | coordinates |
| --- | --- | --- |
| Social protection | 18.001282 | -1.8047912 |
| Central Government | 15.572968 | -1.1467383 |
| Learning | 9.314724 | -0.7745400 |
| In development | 8.997593 | -1.1935550 |
| Internal management | 8.876495 | -0.8657637 |

**Table 3A – Mean coordinates of clusters**

| Dim/cluster | 1 | 2 | 3 |
| --- | --- | --- | --- |
| Dim1 | **+0.15** | **-0.79** | **+0.59** |
| Dim2 | **−0.80** | **+0.21** | **+0.33** |

**Table 4A – Standardized prompts for AI-assisted qualitated search**

| Argument | Prompt |
| --- | --- |
| AI autonomy | Identify and extract all ‘text segments’ potentially answering to this question: “To what extent is the AI autonomous in performing its task?”. Please, stick closely to what emerges from the text and if nothing emerges, indicate: no answer to the question. Apply to the following text: [CASE DESCRIPTION] |
| Organizational impact | Identify and extract all ‘text segments’ potentially answering to this question: “What organizational impact is declared in the project?”. Please, stick closely to what emerges from the text and if nothing emerges, indicate: no answer to the question. Apply to the following text: [CASE DESCRIPTION] |
| Governance | Identify and extract all ‘text segments’ potentially answering to this question: “What system of governance and process control has been designed?”. Please, stick closely to what emerges from the text and if nothing emerges, indicate: no answer to the question. Apply to the following text: [CASE DESCRIPTION] |
